# Supplementary material
Source: Royal Society of Chemistry journal article supplement (doi:10.1039/d5fb00925a)
Supplement: d5fb00925a1.pdf [file d5fb00925a1.pdf]

## **Sustainable Valorization of Food Waste for Microalgal Production of Value-Added Compounds, Bio-Oil, and Biochar**

Himanshu Srivastava<sup>1</sup>, Shivani Dimri<sup>1</sup>, Bhawna Bisht<sup>1</sup>, Dhruv<sup>1</sup>, Rahini Parsoya<sup>1</sup>, Krishna Kumar Jaiswal<sup>2</sup>, Mikhail S Vlaskin<sup>3</sup>, Manisha Nanda<sup>4</sup>, Sanjay Kumar<sup>1</sup>, Harish Chandra Joshi<sup>5</sup>, Vinod Kumar<sup>1,6\*</sup>

<sup>1</sup>Algal Research and Bioenergy Laboratory, Department of Food Science & Technology, Graphic Era (Deemed to be University), Dehradun 248002, India

<sup>2</sup>Bioprocess Engineering Laboratory, Department of Green Energy Technology, Pondicherry University, Puducherry 605014, India

<sup>3</sup>Joint Institute for High Temperatures of the Russian Academy of Sciences, Moscow 125412, Russian Federation

<sup>4</sup>Department of Microbiology, Graphic Era (Deemed to be University), Dehradun 248002, India

<sup>5</sup>Department of Chemistry, Graphic Era (Deemed to be University), Dehradun, Uttarakhand 248002, India

<sup>6</sup>Friendship University of Russia (RUDN University), 6 Miklukho-Maklaya Street, Moscow, 117198, Russian Federation

### **Corresponding author**

Dr. Vinod Kumar,  
Algal Research and Bioenergy Laboratory,  
Department of Food Science & Technology,  
Graphic Era (Deemed to be University),  
Dehradun 248002, India  
vinodkdhatwalia@gmail.com

**S Table 1: Proximate composition of raw FW**

| Parameters       | Composition (%)  |
|------------------|------------------|
| Moisture content | 84.19 $\pm$ 1.78 |
| Ash content      | 1.11 $\pm$ 0.86  |
| Fat content      | 1.65 $\pm$ 1.00  |
| Protein content  | 8.98 $\pm$ 0.00  |
| Fiber content    | 0.68 $\pm$ 0.07  |
| Carbohydrate     | 3.37 $\pm$ 1.29  |

Data are shown as mean  $\pm$  standard deviation.

**S Table 2: Screening of SA inoculum and FW concentration for Optimum Growth**

| SA Inoculum (mL) | FW (mL) | Observed growth |
|------------------|---------|-----------------|
| 90               | 10      | Moderate        |
| 80               | 20      | Highest         |
| 70               | 30      | Low             |
| 60               | 40      | Very low        |

SA- *Scenedesmus abundans*; FW-food waste

**S Table 3: Summary statistics for physicochemical parameters of raw, diluted, and microalgae-treated wastewater used in one-way ANOVA**

| Parameter  | Source of Variation | Degree of Freedom | Sum of Squares (SS) | Mean Squares (MS) | F-value   | p-value | Significance |
|------------|---------------------|-------------------|---------------------|-------------------|-----------|---------|--------------|
| <b>COD</b> | Between Groups      | 2                 | 3166112.00          | 1583056.00        | 114327.59 | <0.0001 | Significant  |
|            | Within Groups       | 6                 | 83.08               | 13.85             | -         | -       | -            |
| <b>TN</b>  | Between Groups      | 2                 | 34518.42            | 17259.21          | 39437.60  | <0.0001 | Significant  |
|            | Within              | 6                 | 2.63                | 0.44              | -         | -       | -            |

|                 |                |   |           |          |           |         |             |
|-----------------|----------------|---|-----------|----------|-----------|---------|-------------|
|                 | Groups         |   |           |          |           |         |             |
| <b>TP</b>       | Between Groups | 2 | 1088.54   | 544.27   | 429686.54 | <0.0001 | Significant |
|                 | Within Groups  | 6 | 0.0076    | 0.0013   | -         | -       | -           |
| <b>Hardness</b> | Between Groups | 2 | 186050.00 | 93025.00 | 103745.35 | <0.0001 | Significant |
|                 | Within Groups  | 6 | 5.38      | 0.90     | -         | -       | -           |
| <b>pH</b>       | Between Groups | 2 | 10.64     | 5.32     | 35.47     | <0.0001 | Significant |
|                 | Within Groups  | 6 | 0.90      | 0.15     | -         | -       | -           |

**S Table 4: Two-way ANOVA with replication for physiochemical characteristics of raw FW, diluted FW (80:20) and algae water**

| ANOVA               |                |                   |                         |           |         |                       |
|---------------------|----------------|-------------------|-------------------------|-----------|---------|-----------------------|
| Source of Variation | Sum of Squares | Degree of Freedom | Measured Sum of Squares | F-value   | P-value | F <sub>critical</sub> |
| Sample              | 3167998.5      | 5                 | 633599.7                | 1201288.7 | 0       | 2.477169              |
| Columns             | 747816.58      | 2                 | 373908.3                | 708920.48 | 0       | 3.259446              |
| Interaction         | 2633161.6      | 10                | 263316.2                | 499240.64 | 0       | 2.106054              |
| Within              | 18.9876        | 36                | 0.527433                | -         | -       | -                     |
| Total               | 6548995.6      | 53                |                         | -         | -       | -                     |

**S Table 5: Summary statistics for biochemical parameters of control and treated FW sample used in Two-Way ANOVA with replication**

| SUMMARY              | Parameter | Control (SA) | Total  |
|----------------------|-----------|--------------|--------|
| <b>Chl a (ug/mL)</b> |           |              |        |
| Count                |           | 3            | 3      |
| Sum                  |           | 2.7          | 8.52   |
| Average              |           | 0.9          | 2.84   |
| Variance             |           | 0.0064       | 0.0009 |
| <b>Chl b (ug/mL)</b> |           |              |        |
| Count                |           | 3            | 3      |

|          |        |        |         |
|----------|--------|--------|---------|
| Sum      | 1.08   | 3.99   | 5.07    |
| Average  | 0.36   | 1.33   | 0.845   |
| Variance | 0.0009 | 0.0361 | 0.29707 |

#### Car (ug/mL)

|          |       |        |         |
|----------|-------|--------|---------|
| Count    | 3     | 3      | 6       |
| Sum      | 0.6   | 4.62   | 5.22    |
| Average  | 0.2   | 1.54   | 0.87    |
| Variance | 1E-04 | 0.0036 | 0.54016 |

#### Carbohydrates (%)

|          |       |       |         |
|----------|-------|-------|---------|
| Count    | 3     | 3     | 6       |
| Sum      | 43.11 | 52.08 | 95.19   |
| Average  | 14.37 | 17.36 | 15.865  |
| Variance | 0.25  | 0.64  | 3.03803 |

#### Protein(%)

|          |        |        |          |
|----------|--------|--------|----------|
| Count    | 3      | 3      | 6        |
| Sum      | 90     | 65.25  | 155.25   |
| Average  | 30     | 21.75  | 25.875   |
| Variance | 0.0064 | 0.0064 | 20.42387 |

#### Lipid (%)

|          |      |        |          |
|----------|------|--------|----------|
| Count    | 3    | 3      | 6        |
| Sum      | 66   | 107.79 | 173.79   |
| Average  | 22   | 35.93  | 28.965   |
| Variance | 0.25 | 0.9604 | 58.69763 |

#### Total

|          |             |             |  |
|----------|-------------|-------------|--|
| Count    | 18          | 18          |  |
| Sum      | 203.49      | 242.25      |  |
| Average  | 11.305      | 13.45833333 |  |
| Variance | 145.5883912 | 175.0484029 |  |

**S Table 6: Two-way ANOVA with replication for biochemical characteristics of control and treated FW sample**

| ANOVA  |    |     |    |        |    |          |         |         |                       |
|--------|----|-----|----|--------|----|----------|---------|---------|-----------------------|
| Source | of | Sum | of | Degree | of | Measured | F-value | P-value | F <sub>critical</sub> |

| Variation   | Squares   | Freedom | Sum of Squares |          |          |          |
|-------------|-----------|---------|----------------|----------|----------|----------|
| Sample      | 5071.9133 | 5       | 1014.383       | 5632.33  | 0        | 2.620654 |
| Columns     | 41.7316   | 1       | 41.7316        | 231.7135 | 7.88E-14 | 4.259677 |
| Interaction | 374.5898  | 5       | 74.91796       | 415.9798 | 0        | 2.620654 |
| Within      | 4.3224    | 24      | 0.1801         | -        | -        | -        |
| Total       | 5492.5571 | 35      | -              | -        | -        | -        |

**S Table 7: One-way ANOVA for phenolic content of control and treated FW samples**

---

| Groups                  | Count | Sum   | Average | Variance |
|-------------------------|-------|-------|---------|----------|
| Control                 | 3     | 17.4  | 5.8     | 6.9169   |
| Algae grown in FW water | 3     | 36.21 | 12.07   | 6.9169   |

ANOVA

| Source of Variation | Sum of Squares | df | MS       | F-value     | P-value     | F critical  |
|---------------------|----------------|----|----------|-------------|-------------|-------------|
| Between Groups      | 58.96935       | 1  | 58.96935 | 8.525401553 | 0.043250856 | 7.708647384 |
| Within Groups       | 27.6676        | 4  | 6.9169   |             |             |             |
| Total               | 86.63695       | 5  |          |             |             |             |

---

**S Table 8: One-way ANOVA for flavonoid content of control and treated FW samples**

---

| Groups                  | Count | Sum   | Average | Variance |
|-------------------------|-------|-------|---------|----------|
| Control                 | 3     | 16.71 | 5.57    | 9.9225   |
| Algae grown in FW water | 3     | 33    | 11      | 0.6084   |

ANOVA

| Source of Variation | Sum of Squares | df | MS       | F-value     | P-value     | F critical  |
|---------------------|----------------|----|----------|-------------|-------------|-------------|
| Between Groups      | 44.22735       | 1  | 44.22735 | 8.399538501 | 0.044197848 | 7.708647384 |
| Within Groups       | 21.0618        | 4  | 5.26545  |             |             |             |
| Total               | 65.28915       | 5  |          |             |             |             |

---

**S Table 9: One-way ANOVA for DPPH content of control and treated FW samples**

| Groups                  | Count | Sum   | Average | Variance |
|-------------------------|-------|-------|---------|----------|
| Control                 | 3     | 37.35 | 12.45   | 0.64     |
| Algae grown in FW water | 3     | 33.15 | 11.05   | 0.0016   |

  

| ANOVA               |        |    |        |             |             |             |
|---------------------|--------|----|--------|-------------|-------------|-------------|
| Source of Variation | SS     | df | MS     | F-value     | P-value     | F critical  |
| Between Groups      | 2.94   | 1  | 2.94   | 9.164588529 | 0.038883177 | 7.708647384 |
| Within Groups       | 1.2832 | 4  | 0.3208 |             |             |             |
| Total               | 4.2232 | 5  |        |             |             |             |

**S Table 10: One-way ANOVA for ROS content of control and treated FW samples**

| Groups                  | Count | Sum   | Average | Variance |
|-------------------------|-------|-------|---------|----------|
| Control                 | 3     | 62.85 | 20.95   | 3.24     |
| Algae grown in FW water | 3     | 73.77 | 24.59   | 5.8564   |

  

| ANOVA               |         |    |         |             |             |             |
|---------------------|---------|----|---------|-------------|-------------|-------------|
| Source of Variation | SS      | df | MS      | F-value     | P-value     | F critical  |
| Between Groups      | 19.8744 | 1  | 19.8744 | 4.369728684 | 0.104784568 | 7.708647384 |
| Within Groups       | 18.1928 | 4  | 4.5482  |             |             |             |
| Total               | 38.0672 | 5  |         |             |             |             |

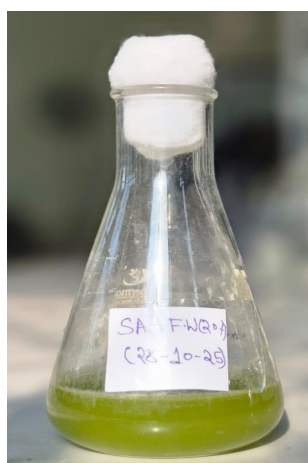

**A**

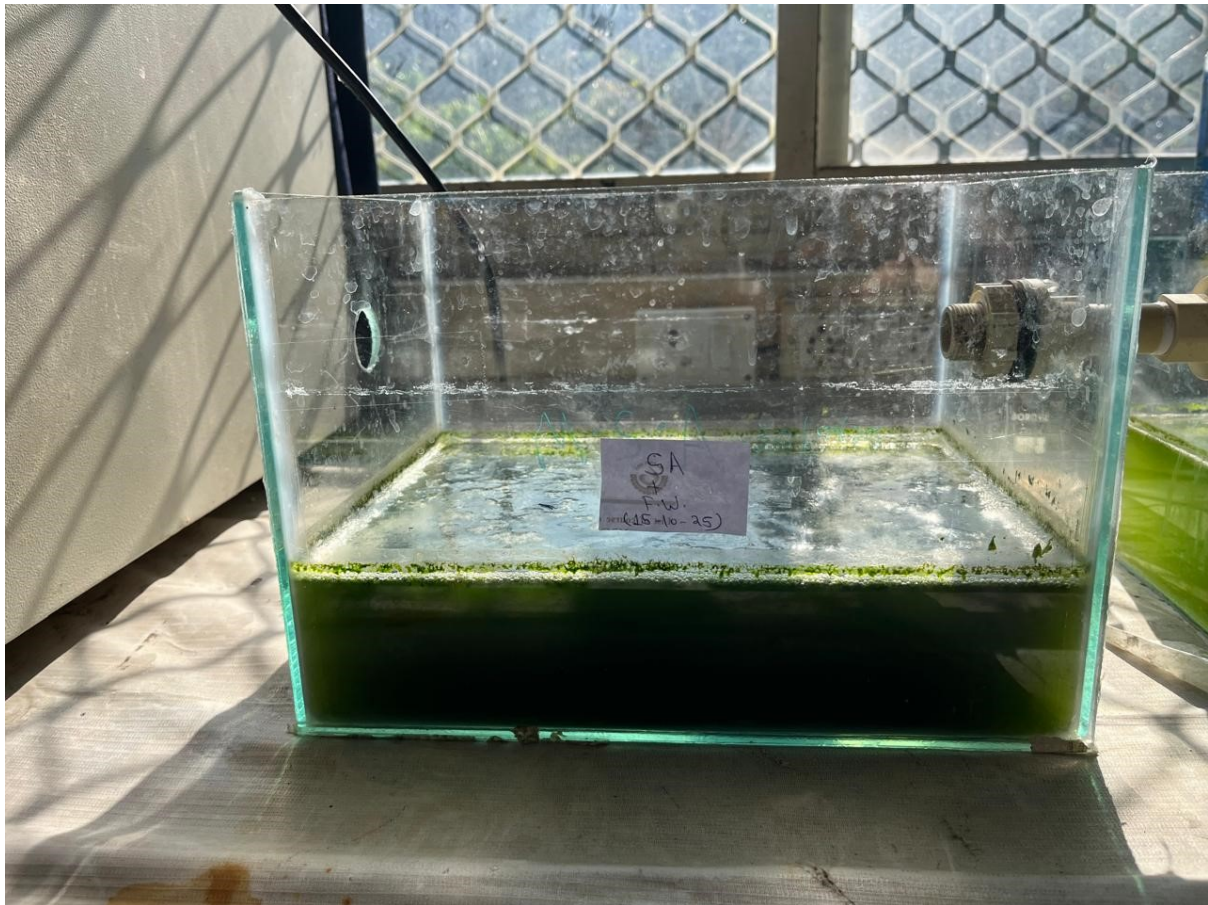

**B**

**S Figure 1:** Optimized growth at 80:20 concentration (SA: FWC).

**S Table 11.** Fatty acid composition (% total fatty acids) of control and food waste culture (FWC)-treated microalgal biomass. Values are presented as mean  $\pm$  standard deviation ( $n = 3$ ). Different superscript letters within the same row indicate statistically significant differences at  $p < 0.05$ .

|  | <b>Fatty Acid</b> | <b>Control</b>                | <b>FWC</b>                    |
|--|-------------------|-------------------------------|-------------------------------|
|  | C14               | 0.00 $\pm$ 0.00 <sup>a</sup>  | 2.57 $\pm$ 0.45 <sup>b</sup>  |
|  | C16               | 42.60 $\pm$ 0.40 <sup>a</sup> | 47.40 $\pm$ 0.52 <sup>b</sup> |
|  | C16:1             | 2.57 $\pm$ 0.45 <sup>a</sup>  | 15.13 $\pm$ 0.12 <sup>b</sup> |
|  | C18               | 14.33 $\pm$ 0.31 <sup>a</sup> | 14.97 $\pm$ 0.23 <sup>a</sup> |
|  | C18:1             | 8.37 $\pm$ 0.60 <sup>a</sup>  | 4.60 $\pm$ 0.20 <sup>b</sup>  |
|  | C18:2             | 8.63 $\pm$ 0.35 <sup>a</sup>  | 3.97 $\pm$ 0.85 <sup>b</sup>  |
|  | C18:3             | 18.03 $\pm$ 0.15 <sup>a</sup> | 0.00 $\pm$ 0.00 <sup>b</sup>  |
|  | C20               | 1.67 $\pm$ 0.49 <sup>a</sup>  | 3.03 $\pm$ 0.15 <sup>b</sup>  |
|  | C20:1             | 0.00 $\pm$ 0.00 <sup>a</sup>  | 2.60 $\pm$ 0.44 <sup>b</sup>  |
